# Supplementary material for: Characteristics of the retinal and choroidal thicknesses in myopic young adult males using swept-source optical coherence tomography
Source: PeerJ. 2025 Mar 5;13:e19030. doi: 10.7717/peerj.19030 (PMC11890031; doi:10.7717/peerj.19030)
Supplement: Supplemental Information 1 [file peerj-13-19030-s001.xlsx]

## Sheet: ورقة1
Age	VA	Auto refractometer (spherical equivalent)	Myopic (M) or Emmetropic (E )	Average retinal thickness (µm)	Sector 1 ( CENTER )	Sector 2 ( Superior inner )	Sector 3 ( superior outer )	Sector 4 ( inferior inner )	Sector 5 (inferior outer)	Sector 6 (Nasal inner )	Sector 7 ( Nasal outer )	Sector 8 ( Temporal inner )	Sector 9 ( Temporal outer )	Average CSI Thickness
20	0.8	-1	M	294	364	327	310	286	322	341	318	298	274	315.556
20	0.8	-1	M	278.4	330	324	291	347	340	334	319	316	286	320.778
22	0.5	-1	M	290.9	426	391	408	436	419	438	391	393	339	404.556
22	0.5	-1	M	291.8	452	444	420	426	401	451	395	393	327	412.111
18	0.7	-1.5	M	276.6	279	242	249	261	220	271	255	257	248	253.556		E	Emmetropia
18	0.7	-1.5	M	263.5	309	230	235	320	307	315	263	269	225	274.778		M	Myopia
23	0.8	-1	M	264.5	359	375	423	317	362	368	347	330	325	356.222		VA	Visual acuity
23	0.8	-1	M	265.3	346	395	409	379	394	356	373	345	357	372.667
23	0.5	-1.75	M	270.3	341	345	344	221	273	298	243	315	270	294.444
23	0.5	-1.75	M	270.9	299	285	310	326	325	269	232	293	286	291.667
23	0.5	-1.25	M	266.2	365	332	370	391	395	335	291	379	354	356.889
23	0.8	-1.25	M	269.8	391	400	397	351	363	322	250	413	397	364.889
24	0.6	-1	M	286.8	282	336	349	227	251	275	205	248	247	268.889
24	0.6	-1	M	290.7	248	280	305	307	309	264	189	259	246	267.444
22	0.2	-4.75	M	281.8	231	302	320	184	230	265	215	156	185	232
22	0.1	-5.75	M	278.4	375	418	425	350	368	349	274	328	311	355.333
21	0.25	-2.25	M	265.4	319	374	363	351	345	302	231	346	327	328.667
21	0.5	-2.25	M	264.8	393	321	334	423	391	359	263	384	379	360.778
20	0.4	-1.75	M	270.4	337	318	321	353	342	355	345	316	288	330.556
20	0.5	-2	M	269	286	322	328	321	300	322	319	253	235	298.444
21	0.2	-2.75	M	261.8	340	349	357	299	237	301	222	353	323	309
21	0.3	-2.5	M	260.5	324	380	321	319	292	305	217	340	368	318.444
21	0.8	-1.75	M	272.4	347	412	411	349	315	366	304	361	297	351.333
21	0.8	-1	M	271,7	336	325	396	429	419	352	321	343	340	362.333
24	0.15	-3.75	M	275.4	236	203	176	234	260	217	181	253	244	222.667
24	0.15	-4.25	M	276	296	304	286	301	295	263	252	322	303	291.333
23	0.8	-1.5	M	268.5	283	319	308	274	245	290	237	264	275	277.222
23	0.8	-1.5	M	265.7	294	352	339	258	231	267	231	283	282	281.889
23	0.6	-1.25	M	264.7	258	282	293	309	307	255	224	292	276	277.333
23	0.8	-1	M	276.4	304	292	306	343	356	280	251	296	281	301
25	0.4	-3.75	M	267.6	319	353	341	300	280	300	247	315	307	306.889
25	0.4	-3.75	M	275.5	290	298	349	292	327	262	224	303	287	292.444
23	0.15	-2.75	M	275.4	227	212	233	245	259	191	159	260	275	229
23	0.6	-2	M	277.5	235	244	255	236	252	200	156	262	282	235.778
23	0.5	-2	M	282.8	270	247	279	274	263	213	189	292	289	257.333
23	0.4	-2	M	292.4	333	352	332	348	388	361	288	289	302	332.556
22	0.6	-1.5	M	276.7	234	311	261	321	266	323	298	298	245	284.111
22	0.6	-1	M	278.9	392	378	352	438	442	372	324	399	367	384.889
22	0.1	-4.5	M	261.4	200	206	208	172	187	164	131	191	189	183.111
22	0.1	-5	M	259.3	181	172	179	213	203	181	125	197	199	183.333
20	0.7	-5	M	272.1	288	269	304	347	341	287	295	276	277	298.222
20	0.7	-1.25	M	268.6	251	290	345	186	211	274	247	244	207	250.556
22	0.7	-1.5	M	296.9	317	228	258	318	297	326	278	260	234	279.556
22	0.5	-1	M	295.7	314	247	261	307	280	290	239	288	259	276.111
21	0.6	-1.5	M	271.2	301	410	413	243	320	311	275	286	292	316.778
21	0.6	-1.5	M	272.3	268	320	379	282	354	278	239	287	312	302.111
24	0.05	-7	M	274.9	170	208	188	167	148	142	94	190	160	163
23	0.1	-3	M	278.9	317	250	221	336	311	273	188	316	267	275.444
23	0.15	-3.25	M	277.8	250	257	243	294	218	214	170	245	250	237.889
22	0.7	-1.5	M	282.6	276	309	295	234	222	230	150	268	238	246.889
22	0.7	-1.75	M	277	269	250	298	232	236	203	146	270	239	238.111
20	0.5	-1.5	M	263.9	211	264	272	237	245	195	178	265	259	236.222
20	0.5	-1.5	M	263.3	264	310	271	221	230	262	203	274	265	255.556
20	0.2	-3	M	275.3	370	375	302	387	409	377	364	342	309	359.444
20	0.2	-3	M	270.6	395	365	418	363	406	367	343	405	400	384.667
22	0.05	-7	M	276	204	244	297	182	228	192	155	205	229	215.111
22	0.1	-6.25	M	275.7	213	264	296	205	260	192	171	226	241	229.778
23	0.6	-1	M	283.7	206	242	258	241	240	183	167	236	228	222.333
23	0.5	-2	M	281	155	220	245	230	262	175	167	184	202	204.444
23	0.4	-2	M	294	404	325	312	422	403	418	388	339	255	362.889
23	0.4	-1.75	M	287.2	346	256	223	369	348	332	256	305	345	308.889
20	0.4	-2.25	M	259.7	249	205	210	283	258	250	209	236	227	236.333
20	0.4	-1.75	M	263.2	281	198	198	302	250	274	217	260	243	247
20	0.5	-1.25	M	282.7	368	335	372	391	387	385	359	335	306	359.778
20	0.4	-1.25	M	281.8	408	388	394	418	380	407	360	362	328	382.778
23	0.15	-3.5	M	266.7	216	233	246	244	240	198	155	200	201	214.778
23	0.15	-4	M	263.5	244	254	251	258	245	227	168	251	219	235.222
23	0.15	-6	M	258.8	183	176	223	239	211	201	168	141	124	185.111
24	0.15	-5.25	M	258.1	198	183	226	192	175	191	154	193	154	185.111
24	0.1	-3	M	269.4	341	308	228	352	309	317	246	314	239	294.889
24	0.15	-3	M	268.2	225	263	252	237	244	226	192	209	179	225.222
23	0.4	-2.5	M	274.5	394	396	400	439	395	359	326	410	386	389.444
23	0.5	-1.75	M	272.7	414	331	372	458	432	364	330	410	380	387.889
20	0.15	-4	M	273.3	357	340	294	355	333	319	240	335	287	317.778
20	0.15	-4	M	270.2	302	326	317	239	226	275	206	287	240	268.667
20	0.1	-5	M	263.6	272	288	272	248	267	217	116	285	263	247.556
20	0.1	-5.25	M	262.6	265	308	287	299	303	215	127	313	299	268.444
19	0.1	-5	M	276.8	410	403	428	370	310	344	273	446	431	379.444
19	0.1	-4.5	M	278.8	387	354	270	402	372	314	236	410	391	348.444
20	0.1	-4.25	M	274.6	432	454	460	430	455	408	382	405	401	425.222
20	0.15	-3.25	M	271.3	405	454	460	430	455	405	401	408	382	422.222
19	0.5	-2.25	M	284.3	316	315	257	330	353	286	241	302	277	297.444
19	0.6	-1.75	M	284.3	308	316	366	308	330	281	242	282	263	299.556
20	0.1	-5.75	M	265.1	266	290	310	302	302	262	228	254	250	273.778
20	0.1	-5	M	266.2	257	294	299	284	299	239	209	261	299	271.222
24	0.2	-2.25	M	288.6	321	321	334	301	320	284	244	343	338	311.778
20	0.3	-2.5	M	287.5	353	300	293	330	321	300	248	351	311	311.889
24	0.7	-1.25	M	258.2	241	258	263	248	233	213	142	267	238	233.667
24	0.6	-1.25	M	252.3	238	232	222	244	244	191	129	225	220	216.111
23	0.1	-4.5	M	284.7	299	315	339	357	371	280	259	296	345	317.889
23	0,.1	-3.75	M	284.1	332	397	418	235	264	319	264	334	285	316.444
22	0.15	-2.25	M	270.7	211	205	185	165	207	180	176	225	218	196.889
20	0.15	-2.25	M	273.8	231	255	235	199	211	196	210	265	256	228.667
19	0.05	-5.25	M	286.5	212	246	257	248	245	188	146	253	223	224.222
19	0.05	-5.25	M	264.8	208	204	201	261	253	171	126	246	224	210.444
24	0.1	-3.5	M	260.6	240	264	257	278	265	248	169	223	222	240.667
24	0.1	-3.5	M	259	276	227	227	265	255	240	156	248	208	233.556
23	0.4	-1.25	M	283.2	238	229	261	250	259	208	205	233	213	232.889
23	0.3	-1.25	M	284.3	192	221	237	271	280	180	165	228	227	222.333
21	1	-0.25	E	287.7	367	289	360	378	407	313	292	348	321	341.667
21	1	-0.25	E	286.4	364	325	351	409	412	329	312	375	347	358.222
18	1	-0.25	E	284	286	366	352	370	341	336	308	299	303	329
18	1	-0.5	E	287.5	441	402	397	348	416	379	328	388	339	382
22	1	-0.25	E	255.5	293	317	313	314	292	286	222	252	250	282.111
22	1	-0.25	E	252.9	305	394	301	311	311	280	224	296	255	297.444
21	1	-0.25	E	272.7	419	367	372	398	409	373	328	388	373	380.778
21	1	-0.25	E	279.4	431	354	278	417	410	393	329	395	348	372.778
22	1	-0.5	E	269.8	164	217	226	185	198	137	115	213	228	187
22	1	-0.5	E	272.2	173	241	241	208	204	165	125	227	246	203.333
21	1	-0.25	E	285.1	259	265	367	217	360	282	270	237	234	276.778
21	1	0	E	285.2	392	242	331	406	376	375	326	308	258	334.889
21	1	-0.75	E	289	256	222	282	280	303	231	202	259	257	254.667
21	1	-0.75	E	279.1	314	298	301	288	284	303	252	344	326	301.111
23	1	-0.25	E	300	404	384	337	396	418	398	365	398	375	386.111
23	1	-0.25	E	307.6	412	361	354	384	413	383	346	396	349	377.556
23	1	-0.25	E	294	398	400	405	421	404	406	355	404	406	399.889
23	1	-0.25	E	293.7	408	367	337	422	408	366	312	404	380	378.222
23	8	-0.5	E	303.1	287	248	229	297	271	240	182	278	224	250.667
23	1	-0.5	E	300.8	253	215	196	292	288	233	166	238	207	232
20	1	-0.75	E	275.6	367	372	335	359	303	366	317	338	ة	344.625
23	1	-0.75	E	292.3	202	170	162	214	198	209	162	172	155	182.667
23	1	-0.75	E	293.7	208	169	187	248	219	211	150	218	188	199.778
23	1	-0.5	E	294.5	313	298	319	237	343	292	310	286	267	296.111
23	1	-0.75	E	292.3	245	337	324	273	316	307	306	242	237	287.444
23	1	-0.5	E	289.2	298	302	298	305	287	263	215	295	292	283.889
23	1	-1	M	288.7	293	289	302	286	283	267	224	269	278	276.778
18	0.8	+0.25	E	293.5	294	278	304	305	336	266	240	250	207	275.556
18	0.7	+0.25	E	288,9	358	244	345	349	329	333	281	313	259	312.333
23	1	0	E	287.8	398	344	301	394	411	343	277	369	333	352.222
23	1	0	E	285.1	378	330	350	395	376	337	278	376	340	351.111
24	0.8	-1.25	M	285.4	324	281	272	331	305	312	243	285	265	290.889
24	0.7	-1.25	M	284.3	342	342	280	340	314	326	223	336	315	313.111
18	1	0	E	267.1	402	426	428	351	367	417	356	342	343	381.333
18	1	0	E	269.8	355	386	409	341	348	355	319	311	333	350.778
23	1	-0.75	E	253.2	333	329	351	366	379	350	326	282	276	332.444
23	1	0	E	251.5	350	364	350	330	343	346	345	270	250	327.556
20	0.7	-0.50	E	289.5	355	355	374	405	396	334	325	370	358	363.556
20	0.7	-0.75	E	289.8	337	301	349	372	408	362	329	316	297	341.222
22	1	+0.25	E	258.2	318	288	308	369	428	343	321	294	278	327.444
22	1	+0.25	E	256.5	346	358	398	396	437	331	330	348	325	363.222
21	0.7	-0.25	E	269.8	284	243	248	284	285	270	210	258	233	257.222
21	0.7	-0.25	E	268.2	299	255	227	307	299	291	215	278	250	269
22	1	-0.75	E	282.1	357	338	331	338	336	311	244	332	305	321.333
22	1	-0.75	E	280.3	354	277	235	289	372	308	248	356	332	307.889
18	0.6	-0.5	E	263.1	292	216	246	328	326	275	248	257	202	265.556
18	0.6	-0.75	E	264	289	242	280	304	293	288	296	242	188	269.111
22	0.7	-0.25	E	269.6	285	269	285	281	301	296	299	266	272	283.778
22	1	-0.25	E	271.4	359	337	305	308	284	343	293	332	297	317.556
20	1	-0.25	E	269.8	300	308	338	310	314	245	173	298	283	285.444
20	1	0	E	265.5	294	314	324	272	298	252	176	301	276	278.556
23	1	+0.5	E	275.6	323	289	301	326	364	278	255	328	321	309.444
23	1	+0.75	E	276.9	263	272	279	303	345	216	216	276	280	272.222
22	1	-0.25	E	272.4	394	410	366	463	445	385	337	408	391	399.889
22	1	-0.25	E	285.9	294	350	340	405	401	326	315	297	274	333.556
20	1	-0.25	E	254	157	263	247	184	240	142	135	220	266	206
20	1	-0.25	E	252	332	280	196	357	340	278	189	320	302	288.222
20	1	-0.25	E	261.8	333	354	322	297	245	330	369	291	278	313.222
20	1	0	E	259.8	360	331	283	358	306	341	261	317	280	315.222
21	1	-0.5	E	284.9	369	414	375	368	292	374	319	380	316	356.333
21	1	-0.75	E	283.6	329	346	314	322	311	319	237	320	281	308.778
22	1	+0.25	E	279.5	265	238	314	311	351	292	232	260	268	281.222
22	1	+0.5	E	283	247	232	294	349	364	247	219	260	283	277.222
20	1	-0.25	E	297.5	406	379	345	423	416	364	279	407	352	374.556
20	1	0	E	300.7	401	355	307	439	429	363	282	399	381	372.889
20	1	-0.75	E	279.8	268	268	275	326	321	263	238	280	218	273
20	1	-0.5	E	277.6	303	254	293	328	308	246	238	319	318	289.667
22	1	-0.25	E	268.3	302	325	323	257	242	260	197	299	251	272.889
22	1	-0.25	E	268.3	270	269	257	252	244	214	155	288	261	245.556
19	1	-0.5	E	271.7	409	345	394	466	461	406	397	377	365	402.222
19	1	-0.25	E	273.8	417	384	353	456	470	404	399	381	371	403.889
20	1	0	E	271.9	375	334	371	410	375	350	278	408	374	363.889
20	1	0	E	274.3	360	310	307	401	387	341	277	377	384	349.333
20	0.8	-0.75	E	290.9	312	345	318	431	398	348	347	316	336	350.111
20	1	-0.5	E	288.4	331	300	337	384	389	325	263	317	331	330.778
23	1	-0.5	E	314.6	359	371	419	385	442	380	380	302	323	373.444
23	1	-0.25	E	317.9	392	423	373	353	401	401	370	395	358	385.111
24	1	-0.5	E	278.3	285	194	257	332	315	246	169	295	305	266.444
24	1	-0.25	E	281.5	295	183	191	351	332	295	188	285	261	264.556
19	1	-0.5	E	284.1	284	246	249	330	320	270	215	246	194	261.556
19	1	-0.5	E	281	329	291	262	374	330	317	251	288	208	294.444
19	1	+0.25	E	268.4	317	326	319	303	289	307	243	273	245	291.333
19	1	-0.25	E	268.6	306	262	259	323	333	304	248	259	216	278.889
19	1	+0.25	E	296.2	325	258	322	337	205	300	237	346	304	292.667
19	1	+0.25	E	288.2	367	274	335	335	330	331	285	326	312	321.667
24	1	-0.25	E	272.8	314	320	345	295	277	298	257	318	302	302.889
24	1	+0.25	E	273.7	309	327	329	332	349	319	259	343	357	324.889
20	1	-0.25	E	292	323	316	337	268	277	270	202	297	265	283.889
20	1	-0.25	E	291.9	294	326	329	271	279	247	177	267	240	270
19	1	+0.50	E	276.7	297	326	311	304	295	251	223	293	278	286.444
19	1	+0.50	E	274.9	335	354	319	341	321	317	275	304	290	317.333
21	1	-0.25	E	280.3	259	348	388	259	279	289	319	271	288	300
21	1	-0.25	E	271.7	258	284	360	315	389	287	335	262	268	306.444
24	0.8	-0.75	E	285.3	379	368	395	314	362	333	300	343	316	345.556
24	0.8	-0.75	E	285.1	325	351	378	372	371	311	297	327	304	337.333
19	1	+0.25	E	275	225	289	401	347	339	248	284	258	306	299.667
19	1	+0.25	E	277.3	23	232	384	270	345	117	191	101	199	206.889
23	1	-0.25	E	278.1	261	292	262	230	239	222	175	235	199	235
23	1	+0.25	E	281.6	271	216	269	288	269	251	211	256	239	252.222
